# Supplementary material for: Chemical Characterization and Biological Properties of Leguminous Honey
Source: MDPI journal article supplement (doi:10.3390/antiox13040482), 2024-04-18
Supplement: s1 [file s1]

**Table S1.** Volatile metabolites detected in the five legume honeys and their identification codes

| Metabolite                             | Code   | RI <sup>t</sup> /RI <sup>sp</sup> | ID      | Metabolite                                               | Code | RI <sup>t</sup> /RI <sup>sp</sup> | ID      |
|----------------------------------------|--------|-----------------------------------|---------|----------------------------------------------------------|------|-----------------------------------|---------|
| <b>Esters</b>                          |        |                                   |         | Epoxylinolol                                             | T17  | 1753/1752                         | RI/MS/S |
| Ethyl butanoate                        | E1     | 1028/1028                         | RI/MS/S | β-Damascenone                                            | T18  | 1805/1805                         | RI/MS/S |
| Ethyl 3-methylbutyrate                 | E2     | 1054/1054                         | RI/MS/S | p-Cymen-8-ol                                             | T19  | 1838/1839                         | RI/MS/S |
| Ethyl hexanoate                        | E3     | 1248/1249                         | RI/MS/S | 2,6-Dimethyl-3,7-octadien-2,6-diol                       | T20  | 1948/1949                         | RI/MS   |
| Ethyl 3-hexenoate                      | E4     | 1304/1316                         | RI/MS   | Safranal                                                 | T21  | 1648/1977                         | MS/S    |
| Ethyl octanoate                        | E5     | 1434/1434                         | RI/MS/S | 3,7-Dimethyl-1,7-octadien-3,6-diol                       | T22  | 2134/2134                         | RI/MS   |
| Ethyl benzoate                         | E6     | 1647/1647                         | RI/MS/S | Thymol                                                   | T23  | 2183/2182                         | RI/MS/S |
| Methyl salicylate                      | E7     | 1766/1766                         | RI/MS/S | Carvacrol                                                | T24  | 2217/2217                         | RI/MS/S |
| Ethyl phenylacetate                    | E8     | 1770/1770                         | RI/MS   | 2,6-Dimethyl-2,7-octadiene-1,6-diol                      | T25  | 2344/2349                         | RI/MS   |
| Methyl 3,5-dimethoxybenzoate           | E9     | -                                 | MS/S    | <i>trans</i> -Isoeugenol                                 | T26  | 2372/-                            | MS/S    |
| <b>Aldehydes</b>                       |        |                                   |         | <b>Furans</b>                                            |      |                                   |         |
| 2-Methyl- 2 butenal                    | Ald 1  | 1100/1099                         | RI/MS/S | 3 Methyl furan                                           | F1   | 901/901                           | RI/MS/S |
| 3-Methyl- 2 butenal                    | Ald 2  | 1236/1242                         | RI/MS/S | 2-Pentylfuran                                            | F2   | 1237/1238                         | RI/MS/S |
| Octanal                                | Ald 3  | 1307/1307                         | RI/MS/S | 5-Isoprenyl-2-methyl-2-vinyl tetrahydrofuran (Herboxide) | F3   | 1253/1255                         | RI/MS   |
| Nonanal                                | Ald 4  | 1398/1399                         | RI/MS/S | Anethofuran                                              | F4   | 1484/1497                         | RI/MS   |
| 2-Furfural                             | Ald 5  | 1468/1469                         | RI/MS/S | 2-Acetylfuran                                            | F5   | 1506/1506                         | RI/MS/S |
| Benzaldehyde                           | Ald 6  | 1527/1527                         | RI/MS/S | <b>Acids</b>                                             |      |                                   |         |
| 5-Methyl-2-furfural                    | Ald 7  | 1570/1569                         | RI/MS/S | Acetic acid                                              | Ac1  | 1460/1460                         | RI/MS/S |
| Benzene acetaldehyde                   | Ald 8  | 1628/1628                         | RI/MS   | Formic acid                                              | Ac2  | 1515/1514                         | RI/MS/S |
| 5-Formylfurfural                       | Ald 9  | 1991/1991                         | RI/MS   | Butanoic acid                                            | Ac3  | 1610/1610                         | RI/MS/S |
| 4-Methoxy benzaldehyde                 | Ald 10 | 2035/2035                         | RI/MS/S | 3-Methylbutanoic acid                                    | Ac4  | 1653/1653                         | RI/MS/S |
| 3-Phenylpropenal                       | Ald 11 | 2049/2050                         | RI/MS/S | Hexanoic acid                                            | Ac5  | 1834/1835                         | RI/MS/S |
| 5-Hydroxymethyl-2-furfural (SHMF)      | Ald 12 | 2532/-                            | MS/S    | Octanoic acid                                            | Ac6  | 2058/2058                         | RI/MS/S |
| <b>Alcohols</b>                        |        |                                   |         | Nonanoic acid                                            | Ac7  | 2165/2165                         | RI/MS/S |
| 3-Methyl-1-butanol                     | A1     | 1240/1243                         | RI/MS/S | Decanoic acid                                            | Ac8  | 2320/2320                         | RI/MS/S |
| 3-Methyl- 3-buten-1-ol                 | A2     | 1277/1283                         | RI/MS/S | Benzoic acid                                             | Ac9  | 2448/-                            | MS/S    |
| 2-Methyl-2-buten-1-ol                  | A3     | 1333/1345                         | RI/MS/S | Dodecanoic acid                                          | Ac10 | 2515/-                            | MS/S    |
| <i>trans</i> -3-Hexen-1-ol             | A4     | 1394/1397                         | RI/MS/S | Phenylacetic acid                                        | Ac11 | 2570/-                            | MS/S    |
| <i>cis</i> -3-Hexene-1-ol              | A5     | 1400/1400                         | RI/MS/S | <b>Sulfur compounds</b>                                  |      |                                   |         |
| 1-Octen-3-ol                           | A6     | 1456/1457                         | RI/MS/S | Dimethyl disulfide                                       | S1   | 1063/1063                         | RI/MS/S |
| 2-Ethyl-1-hexanol                      | A7     | 1494/1494                         | RI/MS/S | Dimethyl trisulfide                                      | S2   | 1376/1376                         | RI/MS/S |
| 2-Furanmethanol                        | A8     | 1646/1647                         | RI/MS/S | <b>Ketones</b>                                           |      |                                   |         |
| 1 Nonanol                              | A9     | 1649/1649                         | RI/MS/S | 3-Hydroxy-2-butanone                                     | K1   | 1314/1315                         | RI/MS/S |
| 5-Methyl-2-furanmethanol               | A10    | 1711/1710                         | RI/MS   | 2-Hydroxy-3-methyl-2-cyclopenten-1-one                   | K2   | 1818/1818                         | RI/MS   |
| Benzyl alcohol                         | A11    | 1869/1868                         | RI/MS/S | 1-(3-Hydroxy-2-furanyl) ethanone                         | K3   | 2001/2000                         | RI/MS   |
| Phenyl ethyl alcohol                   | A12    | 1906/1905                         | RI/MS/S | 4-Hydroxy-3-methylacetophenone                           | K4   | 2180/2194                         | RI/MS/S |
| 3-Phenyl-2-propen-1-ol                 | A13    | 2334/2368                         | RI/MS/S | 3-hydroxy-4-phenyl-2-butanone                            | K5   | 2260/2310                         | RI/MS   |
| 4-Methoxy phenethyl alcohol            | A14    | 2355/-                            | MS/S    | <b>Benzene derivatives</b>                               |      |                                   |         |
| <b>Terpenoids &amp; Norisoprenoids</b> |        |                                   |         | Toluene                                                  | B1   | 1035/1036                         | RI/MS/S |
| α-Pinene                               | T1     | 1019/1019                         | RI/MS/S | Benzyl nitrile                                           | B2   | 1920/1921                         | RI/MS/S |
| α-Terpinene                            | T2     | 1174/1174                         | RI/MS/S | <b>Lactones</b>                                          |      |                                   |         |
| dl-Limonene                            | T3     | 1205/1205                         | RI/MS/S | 2(5H)-Furanone                                           | L1   | 1742/1741                         | RI/MS/S |
| p-Mentha-1,5,8-triene                  | T4     | 1210/1213                         | RI/MS/S | 3-Hydroxy-4,4-dimethyldihydro-2(3H)-furanone             | L2   | 2028/2028                         | RI/MS/S |
| γ-Terpinene                            | T5     | 1231/1232                         | RI/MS/S | <b>Pyranones</b>                                         |      |                                   |         |
| p-Cymene                               | T6     | 1277/1277                         | RI/MS/S | Maltol                                                   | Pyr1 | 1961/1962                         | RI/MS/S |
| p-Cymenene                             | T7     | 1438/1438                         | RI/MS/S | 2,3-Dihydro-3,5-dihydroxy-6-methyl-4h-pyran-4-one (DDMP) | Pyr2 | 2311/2315                         | RI/MS   |
| <i>cis</i> Linalool oxide              | T8     | 1446/1448                         | RI/MS/S | 5-Hydroxymaltol                                          | Pyr3 | 2309/2374                         | RI/MS   |
| Nerol oxide                            | T9     | 1466/1467                         | RI/MS/S | <b>Phenols</b>                                           |      |                                   |         |
| <i>trans</i> Linalool oxide            | T10    | 1473/1473                         | RI/MS/S | 2,6-Di-tert-butyl-4-methylphenol                         | Ph1  | 1927/2101                         | RI/MS/S |
| Linalool                               | T11    | 1542/1543                         | RI/MS/S | 2-Methoxy-4-vinylphenol                                  | Ph2  | 2195/2195                         | RI/MS/S |
| Lilac aldehyde                         | T12    | 1573/1571                         | RI/MS/S | 2,4-Di-tert-butylphenol                                  | Ph3  | 2330/-                            | MS/S    |
| Edulan                                 | T13    | 1602/1584                         | RI/MS/S | 3,4,5-Trimethylphenol                                    | Ph4  | 2248/-                            | MS/S    |
| Hotrienol                              | T14    | 1596/1596                         | RI/MS/S | 4-Methoxyphenol                                          | Ph5  | -                                 | MS/S    |
| Ketosisophorone                        | T15    | 1675/1674                         | RI/MS/S | Methoxyeugenol                                           | Ph6  | 2534/-                            | MS/S    |
| α-Terpineol                            | T16    | 1684/1684                         | RI/MS/S |                                                          |      |                                   |         |

**RI<sup>t</sup>**: Relative retention indices on polar column reported in literature by [www.pherobase.com](http://www.pherobase.com); [www.flavornet.org](http://www.flavornet.org); [www.ChemSpider.com](http://www.ChemSpider.com); [webbook.nist.gov](http://webbook.nist.gov); [pubchem.ncbi.nlm.nih.gov](http://pubchem.ncbi.nlm.nih.gov); **RI<sup>sp</sup>**: Relative retention indices calculated against n-alkanes (C<sub>8</sub>-C<sub>40</sub>) on HP-Innowax column; **ID**: Identification method as indicated by the following: RI: Kovats retention index on the HP-Innowax column; MS: NIST05 and Wiley07 libraries spectra; S: co-injection with authentic standard compounds, where commercially available, on the HP-Innowax column.
